# Supplementary material
Source: PubMed Central journal article supplement (PMC4213190)
Supplement: CIN-13-2014-109-s001.pdf [file CIN-13-2014-109-s001.pdf]

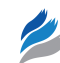

## Supplementary Material

**Supplementary Table 1.** Antibodies used in the experiment. Two slides were stained for RAB-25. The three primary antibodies for negative control were not included.

| ANTIBODY NAME          | GENE SYMBOL      | ANIMAL OF ORIGIN | VENDOR                | CATALOG NUMBER |
|------------------------|------------------|------------------|-----------------------|----------------|
| 14-3-3_beta            | YWHAB            | Rabbit           | Santa Cruz            | sc-628         |
| 14-3-3_epsilon         | YWHAE            | Mouse            | Santa Cruz            | sc-23957       |
| 14-3-3_zeta            | YWHAZ            | Rabbit           | Santa Cruz            | sc-1019        |
| 4E-BP1                 | EIF4EBP1         | Rabbit           | CST                   | 9452           |
| 4E-BP1_pS65            | EIF4EBP1         | Rabbit           | CST                   | 9456           |
| 4E-BP1_pT37T46         | EIF4EBP1         | Rabbit           | CST                   | 9459           |
| 4E-BP1_pT70            | EIF4EBP1         | Rabbit           | CST                   | 9455           |
| 53BP1                  | TP53BP1          | Rabbit           | CST                   | 4937           |
| A-Raf_pS299            | ARAF             | Rabbit           | CST                   | 4431           |
| ACC1                   | ACACA            | Rabbit           | Epitomics             | 1768-1         |
| ACC_pS79               | ACACA, ACACB     | Rabbit           | CST                   | 3661           |
| Acetyl-a-Tubulin-Lys40 | TUBA1B           | Rabbit           | CST                   | 5335           |
| ACVRL1                 | ACVRL1           | Rabbit           | Epitomics             | 2940-1         |
| ADAR1                  | ADAR             | Rabbit           | Abcam                 | ab88574        |
| Akt                    | AKT1, AKT2, AKT3 | Rabbit           | CST                   | 9272           |
| Akt_pS473              | AKT1, AKT2, AKT3 | Rabbit           | CST                   | 9271           |
| Akt_pT308              | AKT1, AKT2, AKT3 | Rabbit           | CST                   | 9275           |
| AMPK_alpha             | PRKAA1           | Rabbit           | CST                   | 2532           |
| AMPK_pT172             | PRKAA1           | Rabbit           | CST                   | 2535           |
| Annexin-1              | ANXA1            | Mouse            | BD Transduction       | 610066         |
| Annexin_VII            | ANXA7            | Mouse            | BD Biosciences        | 610668         |
| AR                     | AR               | Rabbit           | Epitomics             | 1852-1         |
| ARHI                   | DIRAS3           | Mouse            | Dr. Robert C Bast Jr. | Customer made  |
| ARID1 A                | ARID1A           | Mouse            | Abgent                | AT1188a        |
| ASNS                   | ASNS             | Rabbit           | Sigma                 | HPA029318      |
| ATM                    | ATM              | Rabbit           | Abcam                 | ab32420        |
| B-Raf                  | BRAF             | Mouse            | Santa Cruz            | sc-5284        |
| Bad_pS112              | BAD              | Rabbit           | CST                   | 9291           |
| Bak                    | BAK1             | Rabbit           | Epitomics             | 1542-1         |
| Bap1-c-4               | BAP1             | Rabbit           | Alomine               | APC-125        |
| Bax                    | BAX              | Rabbit           | CST                   | 2772           |
| Bcl-2                  | BCL2             | Mouse            | Dako                  | Dako M0887     |
| Bcl-xL                 | BCL2L1           | Rabbit           | CST                   | 2762           |
| Beclin                 | BECN1            | Goat             | Santa Cruz            | sc-10086       |
| beta-Catenin           | CTNNB1           | Rabbit           | CST                   | 9562           |
| Bid                    | BID              | Rabbit           | Epitomics             | 1008-1         |
| Bim                    | BCL2L11          | Rabbit           | Epitomics             | 1036-1         |
| BRCA2                  | BRCA2            | Rabbit           | CST                   | 9012           |
| c-Jun_pS73             | JUN              | Rabbit           | CST                   | 9164           |
| c-Kit                  | KIT              | Rabbit           | Epitomics             | 1522           |
| c-Met_pY1235           | MET              | Rabbit           | CST                   | 3129           |
| c-Myc                  | MYC              | Rabbit           | CST                   | 9402           |
| C-Raf                  | RAF1             | Rabbit           | Millipore             | 05-739         |

(Continued)

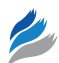

Supplementary Table 1. (Continued)

| ANTIBODY NAME           | GENE SYMBOL  | ANIMAL OF ORIGIN | VENDOR              | CATALOG NUMBER |
|-------------------------|--------------|------------------|---------------------|----------------|
| C-Raf_pS338             | RAF1         | Rabbit           | CST                 | 9427           |
| Caspase-7_cleavedD198   | CASP7        | Rabbit           | CST                 | 9491           |
| Caveolin-1              | CAV1         | Rabbit           | CST                 | 3238           |
| CD20                    | MS4A1        | Rabbit           | Epitomics           | 1632           |
| CD31                    | PECAM1       | Mouse            | Dako                | M0823          |
| CD49b                   | ITGA2        | Mouse            | BD                  | 611016         |
| CDK1                    | CDC2         | Rabbit           | CST                 | 9112           |
| Chk1                    | CHEK1        | Rabbit           | CST                 | 2345           |
| Chk1_pS345              | CHEK1        | Rabbit           | CST                 | 2348           |
| Chk2                    | CHEK2        | Mouse            | CST                 | 3440           |
| Chk2_pT68               | CHEK2        | Rabbit           | CST                 | 2197           |
| clAP                    | BIRC2        | Rabbit           | Millipore           | 07-759         |
| Claudin-7               | CLDN7        | Rabbit           | Novus               | NB100-91714    |
| Collagen_VI             | COL6A1       | Rabbit           | Santa Cruz          | SC-20649       |
| Cyclin_B1               | CCNB1        | Rabbit           | Epitomics           | 1495-1         |
| Cyclin_D1               | CCND1        | Rabbit           | Santa Cruz          | SC-718         |
| Cyclin_E1               | CCNE1        | Mouse            | Santa Cruz          | SC-247         |
| Cyclin_E2               | CCNE2        | Rabbit           | Epitomics           | 1142           |
| DJ-1                    | PARK7        | Rabbit           | Abcam               | ab76008        |
| Dvl3                    | DVL3         | Rabbit           | CST                 | 3218           |
| E-Cadherin              | CDH1         | Rabbit           | CST                 | 4065           |
| eEF2                    | EEF2         | Rabbit           | CST                 | 2332           |
| eEF2 K                  | EEF2K        | Rabbit           | CST                 | 3692           |
| EGFR                    | EGFR         | Rabbit           | CST                 | 2232           |
| EGFR_pY1068             | EGFR         | Rabbit           | CST                 | 2234           |
| EGFR_pY1173             | EGFR         | Rabbit           | Epitomics           | 1124           |
| eIF4E                   | EIF4E        | Rabbit           | CST                 | 9742           |
| eIF4G                   | EIF4G1       | Rabbit           | CST                 | 2498           |
| ER-alpha                | ESR1         | Rabbit           | Lab Vision          | RM-9101-S      |
| ER-alpha_pS118          | ESR1         | Rabbit           | Epitomics           | 1091-1         |
| ERK2                    | MAPK1        | Rabbit           | Santa Cruz          | sc-154         |
| ETS-1                   | ETS1         | Rabbit           | BethYl              | A303-501 A     |
| FASN                    | FASN         | Rabbit           | CST                 | 3180           |
| Fibronectin             | FN1          | Rabbit           | Epitomics           | 1574-1         |
| FoxM1                   | FOXM1        | Rabbit           | CST                 | 5436           |
| FOXO3a                  | FOXO3        | Rabbit           | CST                 | 9467           |
| FOXO3a_pS318_S321       | FOXO3        | Rabbit           | CST                 | 9465           |
| G6PD                    | G6PD         | Mouse            | Santa Cruz          | sc-373887      |
| GAB2                    | GAB2         | Rabbit           | CST                 | 3239           |
| GAPDH                   | GAPDH        | Mouse            | Ambion              | AM4300         |
| GATA3                   | GATA3        | Mouse            | BD Biosciences      | 558686         |
| GSK3-alpha-beta         | GSK3A, GSK3B | Mouse            | Santa Cruz          | SC-7291        |
| GSK3-alpha-beta_pS21_S9 | GSK3A, GSK3B | Rabbit           | CST                 | 9331           |
| GSK3_pS9                | GSK3A, GSK3B | Rabbit           | CST                 | 9336           |
| HER2                    | ERBB2        | Mouse            | Lab Vision          | MS-325-P1      |
| HER2_pY1248             | ERBB2        | Rabbit           | Upstate (Millipore) | 06-229         |

(Continued)



Supplementary Table 1. (Continued)

| ANTIBODY NAME     | GENE SYMBOL  | ANIMAL OF ORIGIN | VENDOR              | CATALOG NUMBER |
|-------------------|--------------|------------------|---------------------|----------------|
| HER3              | ERBB3        | Mouse            | Lab Vision          | MS-201-P1 ABX  |
| HER3_pY1289       | ERBB3        | Rabbit           | CST                 | 4791           |
| Heregulin         | NRG1         | Rabbit           | CST                 | 2573           |
| HSP70             | HSPA1A       | Rabbit           | CST                 | 4872           |
| IGFBP2            | IGFBP2       | Rabbit           | CST                 | 3922           |
| INPP4B            | INPP4B       | Goat             | Santa Cruz          | SC-12318       |
| IRS1              | IRS1         | Rabbit           | Upstate (Millipore) | 06-248         |
| JNK2              | MAPK9        | Rabbit           | CST                 | 4672           |
| JNK_pT183_Y185    | MAPK8        | Rabbit           | CST                 | 4668           |
| Ku80              | XRCC5        | Rabbit           | CST                 | 2180           |
| Lck               | LCK          | Rabbit           | CST                 | 2752           |
| LKB1              | STK11        | Mouse            | Abcam               | ab15095        |
| MAPK_pT202_Y204   | MAPK1, MAPK3 | Rabbit           | CST                 | 4377           |
| MEK1              | MAP2K1       | Rabbit           | Epitomics           | 1235-1         |
| MEK1_pS217_S221   | MAP2K1       | Rabbit           | CST                 | 9154           |
| MIG-6             | ERRF1        | Mouse            | Sigma               | WH0054206M1    |
| Mre11             | MRE11A       | Rabbit           | CST                 | 4847           |
| mTOR              | FRAP1        | Rabbit           | CST                 | 2983           |
| mTOR_pS2448       | FRAP1        | Rabbit           | CST                 | 2971           |
| MYH11             | MYH11        | Rabbit           | SDI/Novus           | 21370002       |
| Myosin-IIa_pS1943 | MYH9         | Rabbit           | CST                 | 5026           |
| N-Cadherin        | CDH2         | Rabbit           | CST                 | 4061           |
| N-Ras             | NRAS         | Mouse            | Santa Cruz          | sc-31          |
| NDRG1_pT346       | NDRG1        | Rabbit           | CST                 | 3217           |
| NF-kB-p65_pS536   | NFKB1        | Rabbit           | CST                 | 3033           |
| NF2               | NF2          | Rabbit           | SDI                 | 2271.00.02     |
| Notch1            | NOTCH1       | Rabbit           | CST                 | 3268           |
| P-Cadherin        | CDH3         | Rabbit           | CST                 | 2130           |
| p21               | CDKN1A       | Rabbit           | Santa Cruz          | SC-397         |
| p27               | CDKN1B       | Rabbit           | Epitomics           | 1591-1         |
| p27_pT157         | CDKN1B       | Rabbit           | R&D                 | AF1555         |
| p27_pT198         | CDKN1B       | Rabbit           | Abcam               | ab64949        |
| p38_MAPK          | MAPK14       | Rabbit           | CST                 | 9212           |
| p38_pT180_Y182    | MAPK14       | Rabbit           | CST                 | 9211           |
| p53               | TP53         | Rabbit           | CST                 | 9282           |
| p62-LCK-ligand    | SQSTM1       | Mouse            | BD Transduction Lab | 610833         |
| p70S6 K           | RPS6KB1      | Rabbit           | Epitomics           | 1494-1         |
| p70S6 K_pT389     | RPS6KB1      | Rabbit           | CST                 | 9205           |
| p90RSK            | RPS6KA1      | Rabbit           | CST                 | 9347           |
| p90RSK_pT359_S363 | RPS6KA1      | Rabbit           | CST                 | 9344           |
| PAI-1             | SERPINE1     | Mouse            | BD Biosciences      | 612024         |
| Paxillin          | PXN          | Rabbit           | Epitomics           | 1500-1         |
| PCNA              | PCNA         | Mouse            | Abcam               | ab29           |
| PDCD4             | PDCD4        | Rabbit           | Rockland            | 600-401-965    |
| PDK1              | PDK1         | Rabbit           | CST                 | 3062           |
| PDK1_pS241        | PDK1         | Rabbit           | CST                 | 3061           |

(Continued)

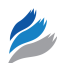

Supplementary Table 1. (Continued)

| ANTIBODY NAME        | GENE SYMBOL    | ANIMAL OF ORIGIN | VENDOR              | CATALOG NUMBER |
|----------------------|----------------|------------------|---------------------|----------------|
| PEA-15               | PEA15          | Rabbit           | CST                 | 2780           |
| PEA15_pS116          | PEA15          | Rabbit           | Invitrogen          | 44-836G        |
| PI3 K-p110-alpha     | PIK3CA         | Rabbit           | CST                 | 4255           |
| PI3 K-p85            | PIK3R1, PIK3R2 | Rabbit           | Upstate (Millipore) | 06-195         |
| PKC-alpha            | PRKCA          | Mouse            | Upstate (Millipore) | 05-154         |
| PKC-alpha_pS657      | PRKCA          | Rabbit           | Upstate (Millipore) | 06-822         |
| PKC-delta_pS664      | PRKCD          | Rabbit           | Millipore           | 07-875         |
| PKC-pan_Betall_pS660 | PKC            | Rabbit           | CST                 | 9371           |
| PR                   | PGR            | Rabbit           | Epitomics           | 1483-1         |
| PRAS40_pT246         | AKT1S1         | Rabbit           | Biosource           | 441100G        |
| PRDX1                | PRDX1          | Rabbit           | Sigma/Atlas         | HPA007730      |
| PREX1                | REX1           | Rabbit           | Abcam               | ab102739       |
| PTEN                 | PTEN           | Rabbit           | CST                 | 9552           |
| Rab-25               | Rab25          | Rabbit           | CST                 | 4314           |
| Rab11                | RAB11A, RAB11B | Rabbit           | CST                 | 3539           |
| Rad50                | RAD50          | Mouse            | Millipore           | 05-525         |
| Rad51                | RAD51          | Mouse            | Chem Biotech        | na 71          |
| Raptor               | RPTOR          | Rabbit           | CST                 | 2280           |
| Rb_pS807_S811        | RB1            | Rabbit           | CST                 | 9308           |
| RBM15                | RBM15          | Rabbit           | SDI/Novus           | 21390002       |
| Rictor               | RICTOR         | Rabbit           | CST                 | 2114           |
| Rictor_pT1135        | RICTOR         | Rabbit           | CST                 | 3806           |
| S6                   | RPS6           | Rabbit           | CST                 | 2217           |
| S6_pS235_S236        | RPS6           | Rabbit           | CST                 | 2211           |
| S6_pS240_S244        | RPS6           | Rabbit           | CST                 | 2215           |
| SCD1                 | SCD1           | Mouse            | Santa Cruz          | sc-58420       |
| SF2                  | SFRS1          | Mouse            | Invitrogen          | 32-4500        |
| Shc_pY317            | SHC1           | Rabbit           | CST                 | 2431           |
| Smad1                | SMAD1          | Rabbit           | Epitomics           | 1649-1         |
| Smad3                | SMAD3          | Rabbit           | Epitomics           | 1735-1         |
| Smad4                | SMAD4          | Mouse            | Santa Cruz          | sc-7966        |
| Src                  | SRC            | Mouse            | Upstate (Millipore) | 05-184         |
| Src_pY416            | SRC            | Rabbit           | CST                 | 2101           |
| Src_pY527            | SRC            | Rabbit           | CST                 | 2105           |
| STAT3_pY705          | STAT3          | Rabbit           | CST                 | 9131           |
| STAT5-alpha          | STAT5A         | Rabbit           | Epitomics           | 1289-1         |
| Stathmin             | STMN1          | Rabbit           | Epitomics           | 1972-1         |
| Syk                  | SYK            | Mouse            | Santa Cruz          | sc-1240        |
| TAZ                  | WWTR1          | Rabbit           | CST                 | 2149           |
| TFRC                 | TFRC           | Rabbit           | SDI/Novus           | 22500002       |
| TIGAR                | C12ORF5        | Rabbit           | Epitomics           | S1711          |
| Transglutaminase     | TGM2           | Mouse            | Lab Vision          | MS-224         |
| TSC1                 | TSC1           | Rabbit           | CST                 | 4906           |
| Tuberin              | TSC2           | Rabbit           | Epitomics           | 1613-1         |
| Tuberin_pT1462       | TSC2           | Rabbit           | CST                 | 3617           |
| VEGFR2               | KDR            | Rabbit           | CST                 | 2479           |

(Continued)



Supplementary Table 1. (Continued)

| ANTIBODY NAME | GENE SYMBOL | ANIMAL OF ORIGIN | VENDOR        | CATALOG NUMBER |
|---------------|-------------|------------------|---------------|----------------|
| VHL           | VHL         | Mouse            | BD Pharmingen | 556347         |
| XBP1          | XBP1        | Goat             | Santa Cruz    | sc-32136       |
| XRCC1         | XRCC1       | Rabbit           | CST           | 2735           |
| YAP           | YAP1        | Rabbit           | Santa Cruz    | sc-15407       |
| YAP_pS127     | YAP1        | Rabbit           | CST           | 4911           |
| YB-1          | YBX1        | Rabbit           | SDI           | 1725.00.02     |
| YB-1_pS102    | YBX1        | Rabbit           | CST           | 2900           |
| alpha-Catenin | CTNNA1      | Mouse            | Calbiochem    | CA1030         |
| c-Met         | MET         | Mouse            | CST           | 3127           |
| Caspase 8     | CASP8       | Mouse            | CST           | 9746           |
| ERCC1         | ERCC1       | Mouse            | Lab Vision    | MS-671-PO      |
| FOXO3a        | FOXO3       | Rabbit           | CST           | 2497           |
| Gab2          | GAB2        | Rabbit           | CST           | 3239           |
| MSH2          | MSH2        | Mouse            | CST           | 2850           |
| MSH6          | MSH6        | Rabbit           | SDI           | 2203.00.02     |
| PARP_cleaved  | PARP1       | Mouse            | CST           | 9546           |
| Rb            | RB1         | Mouse            | CST           | 9309           |
| SETD2         | SETD2       | Rabbit           | Abcam         | ab69836        |
| Smac          | DIABLO      | Mouse            | CST           | 2954           |
| Snail         | SNAI2       | Mouse            | CST           | 3895           |
| TTF1          | TTF1        | Rabbit           | Epitomics     | 2044-1         |
